# Supplementary material for: Beta-Cyclodextrin Molecules (β‐CD) Modified PVDF Membranes to Remove Multi-Ionic Dye Solutions using Steric, Inclusion, and Dielectric Exclusion
Source: Preprints.org preprint supplement (doi:10.20944/preprints202404.1247.v1), 2024-04-18
Supplement: Supplementary file 1 [file supplementary]

**Beta-cyclodextrin Molecules (β‐CD) modified PVDF Membranes to remove multi-ionic Dye solutions using steric, inclusion, and dielectric-exclusion.**

Wadha Alrashedi1,2, Hafedh Kochkar1,2* ,Ismail Ercan3

1 Department of Chemistry, College of Science, Imam Abdulrahman Bin Faisal University, P.O. Box 1982, 31441, Dammam, Saudi Arabia.

2 Basic & Applied Scientific Research Center, Imam Abdulrahman Bin Faisal University, P.O. Box 1982, 31441, Dammam, Saudi Arabia.

3Department of Electrical and Electronics Engineering, Faculty of Engineering, Düzce University, 81010, Turkey.

**Corresponding author. E-mail address:* [*hbkochkar@iau.edu.sa*](mailto:hbkochkar@iau.edu.sa) *(H. Kochkar)*

**
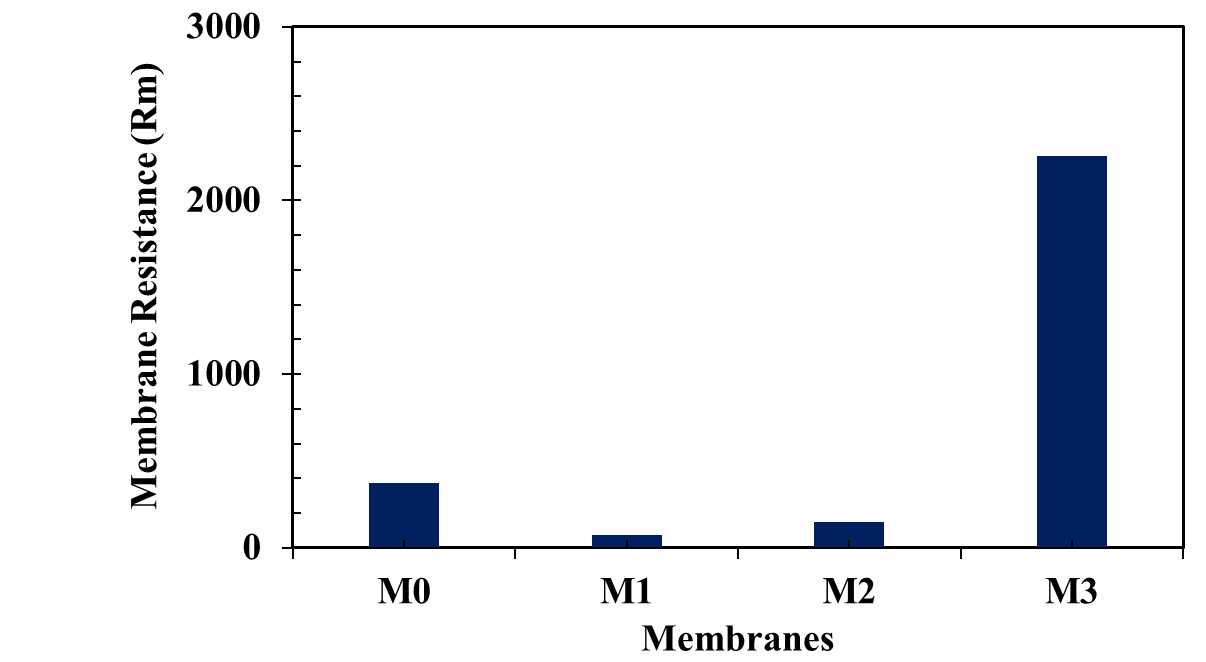
**

**Figure S1**: Membrane resistance of PVDF-PVP(1-x)- β- CD(x) membranes: M0 (x=0), M1 (x=0.25), M2 (x=0.50), M3 (x=0.75) and M4 (x=1.0).


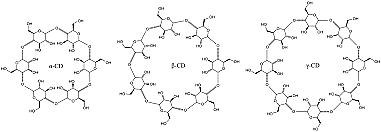

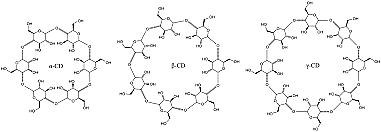

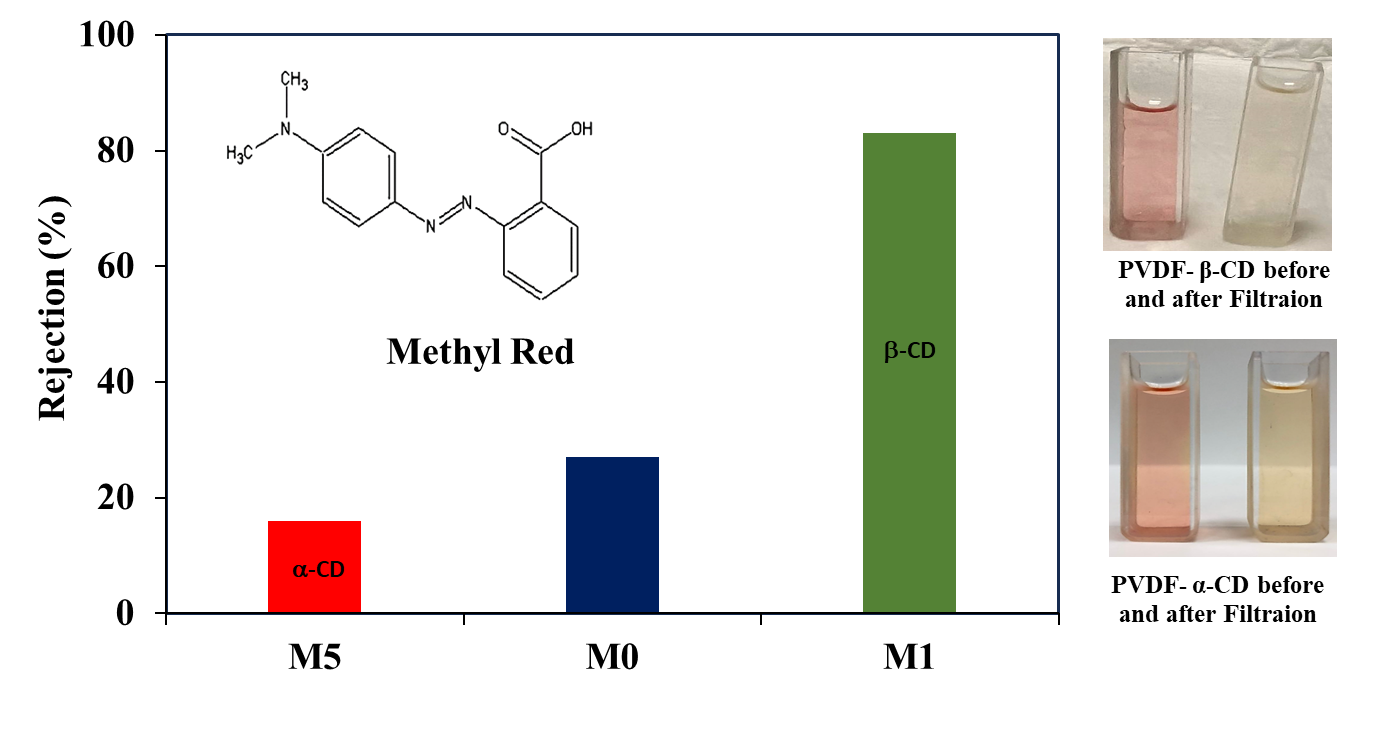


**Figure S2**. Methyl Red (MR) rejection with different membranes: **M5** (PVDF-PVP (0.75)- a-CD(0.25)), **M0** ( PVDF-PVP), and **M1** (PVDF-PVP (0.75)- bCD(0.25)).
